# Supplementary material for: Structural and Functional Characterization of a Novel α-Conotoxin Mr1.7 from Conus marmoreus Targeting Neuronal nAChR α3β2, α9α10 and α6/α3β2β3 Subtypes
Source: PubMed Central journal article supplement (PMC4483627; doi:10.3390/md13063259), 2015-05-27
Supplement: marinedrugs-13-03259-s001.pdf [file marinedrugs-13-03259-s001.pdf]

## Supplementary Information

**Table S1.** Molecular mass of Mr1.7 and its variants. \* C-terminal amidated; The mutated residues and Cysteines are in bold and italic face.

| $\alpha$ -CTX                    | Amino Acid Sequence          | Theoretical MW (Da) | $m/z$ (+1) |
|----------------------------------|------------------------------|---------------------|------------|
| Mr1.7                            | PECCTHPACHVSHPELC *          | 1856.72             | 1857.77    |
| RaaMr1.7                         | <b>R</b> PECCTHPACHVSHPELC * | 2012.85             | 2013.86    |
| Mr1.7[P1A]                       | <i>A</i> ECCTHPACHVSHPELC *  | 1830.74             | 1831.70    |
| Mr1.7[E2A]                       | PACCTHPACHVSHPELC *          | 1798.75             | 1799.75    |
| Mr1.7[H10A]                      | PECCTHPAC <i>A</i> VSHPELC * | 1790.73             | 1791.71    |
| Mr1.7[V11G]                      | PECCTHPACHGSHPELC *          | 1814.71             | 1815.75    |
| Mr1.7[S12N]                      | PECCTHPACHVMHPELC *          | 1883.76             | 1884.76    |
| Mr1.7[V11G,S12N]                 | PECCTHPACHGVMHPELC *         | 1841.72             | 1842.67    |
| Mr1.7[E2A,S12N]                  | PACCTHPACHVMHPELC *          | 1825.73             | 1826.76    |
| Mr1.7[E2G,V11G,S12N, $\Delta$ 1] | GCCTHPACHGVMHPELC *          | 1672.61             | 1673.74    |

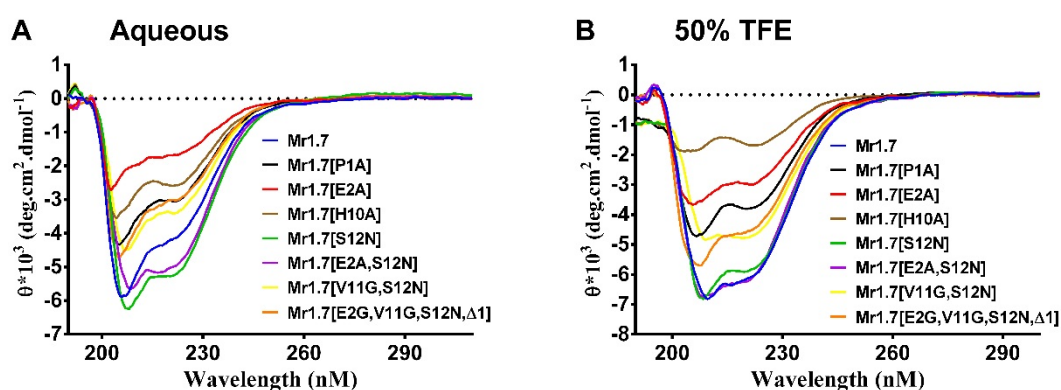

**Figure S1.** Circular dichroism spectra of Mr1.7 and its variants. (A) CD of the peptides in 0.01 M PBS (pH = 7.2); (B) CD of the peptides in 0.01 M PBS and 50% TFE (pH = 7.2). Circular dichroism (CD) spectra were measured between 190 and 340 nm on a BioLogic Mos 450 spectropolarimeter (Grenoble, France). The peptides were dissolved in 0.01 M phosphate buffer (pH 7.2) or 0.01 M phosphate buffer containing 50% trifluoroethanol (TFE) to a final concentration of 35  $\mu$ M. A 1 cm path length quartz cell was employed. Each spectrum represents the accumulation of eight individual scans collected at 1.0 nm intervals at a bandwidth of 1.0 nm. The CD spectra indicated Mr1.7 variants had similar  $\alpha$ -helical structure with that of Mr1.7, suggesting they had the same disulfide connectivity (I-III, II-IV).

**Table S2.** Chemical shift assignments of Mr1.7.

| Residue | HN   | $\alpha$ | $\beta$    | Other                             |
|---------|------|----------|------------|-----------------------------------|
| Pro1    | -    | 4.42     | 2.49       | $\gamma$ 2.02 $\delta$ 3.43       |
| Glu2    | 9.09 | 4.29     | 2.12       | $\gamma$ 2.49                     |
| Cys3    | 8.88 | 4.56     | 3.26, 2.50 | -                                 |
| Cys4    | 8.00 | 4.30     | 3.31, 2.95 | -                                 |
| Thr5    | 7.81 | 4.39     | 4.31       | $\gamma$ 1.17                     |
| His6    | 8.06 | 5.32     | 3.40       | $\delta$ 7.39 $\epsilon$ 8.63     |
| Pro7    | -    | 4.30     | 2.42, 2.22 | $\gamma$ 2.04 $\delta$ 4.12, 3.98 |
| Ala8    | 8.68 | 4.20     | 1.43       | -                                 |
| Cys9    | 7.65 | 4.22     | 3.31       | -                                 |
| His10   | 8.82 | 4.39     | 3.55, 3.32 | $\delta$ 7.24 $\epsilon$ 8.73     |
| Val11   | 8.28 | 3.97     | 2.21       | $\gamma$ 1.06, 1.00               |
| Ser12   | 7.45 | 4.45     | 3.98, 3.82 | -                                 |
| His13   | 7.67 | 5.18     | 3.32, 3.12 | $\delta$ 7.44 $\epsilon$ 8.66     |
| Pro14   | -    | 4.36     | 2.35       | $\gamma$ 2.05 $\delta$ 3.62, 3.46 |
| Glu15   | 8.56 | 4.27     | 2.12       | $\gamma$ 2.57, 2.50               |
| Leu16   | 7.63 | 4.32     | 1.79       | $\gamma$ 1.51 $\delta$ 0.91, 0.80 |
| Cys17   | 7.73 | 4.79     | 2.58, 2.38 | -                                 |

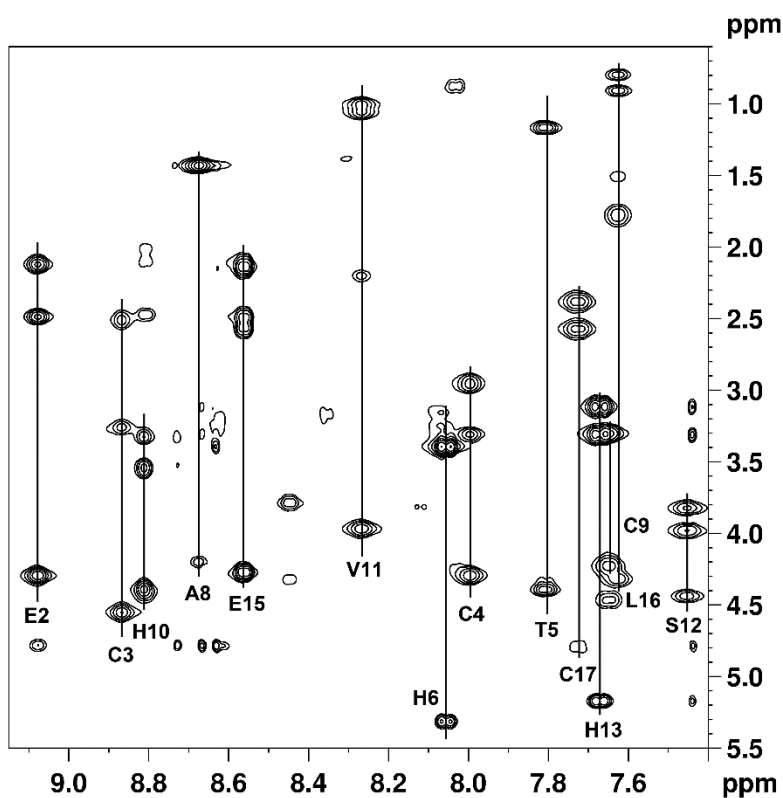**Figure S2.** The portion of TOCSY spectrum of Mr1.7.

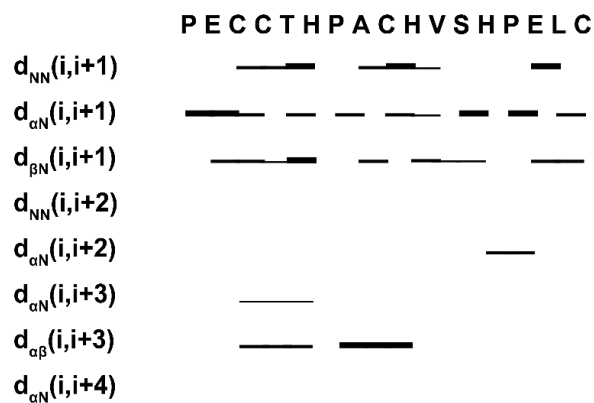

**Figure S3.** Summary of the sequential NOE connectivities involving the  $H_N$ ,  $H_\alpha$ , and  $H_\beta$  protons measured at 298 K for Mr1.7.

© 2015 by the authors; licensee MDPI, Basel, Switzerland. This article is an open access article distributed under the terms and conditions of the Creative Commons Attribution license (<http://creativecommons.org/licenses/by/4.0/>).
